# Supplementary material for: Comparison of DNA Methylation in Schwann Cells before and after Peripheral Nerve Injury in Rats
Source: PubMed Central journal article supplement (PMC5385226; doi:10.1155/2017/5393268), 2017-03-26
Supplement: 5393268.f1.pdf [file 5393268.f1.pdf]

**Table S1.** Distribution of Reads GC in different Schwann cells groups

| GC(%)  | ASCs_1  |        | ASCs_2  |         | ASCs_3  |         | NSCs_1  |         |
|--------|---------|--------|---------|---------|---------|---------|---------|---------|
|        | number  | %      | number  | %       | number  | %       | number  | %       |
| 1-10   | 184     | 0.00   | 158     | 0.0013  | 135     | 0.0013  | 148     | 0.0011  |
| 11-20  | 10293   | 0.08   | 9570    | 0.0789  | 7283    | 0.0726  | 11179   | 0.0851  |
| 21-30  | 323152  | 2.48   | 307257  | 2.5322  | 238650  | 2.3802  | 357232  | 2.7191  |
| 31-40  | 3002145 | 23.08  | 2978224 | 24.5449 | 2338347 | 23.3217 | 3382174 | 25.7436 |
| 41-50  | 5857217 | 45.04  | 5382716 | 44.3614 | 4504813 | 44.9291 | 5852141 | 44.5439 |
| 51-60  | 3398380 | 26.13  | 3077875 | 25.3662 | 2628824 | 26.2188 | 3177854 | 24.1884 |
| 61-70  | 392842  | 3.0206 | 356171  | 2.9354  | 296520  | 2.9574  | 340067  | 2.5884  |
| 71-80  | 20041   | 0.1541 | 20375   | 0.1679  | 11259   | 0.1123  | 16099   | 0.1225  |
| 81-90  | 1127    | 0.0087 | 1436    | 0.0118  | 661     | 0.0066  | 1032    | 0.0079  |
| 91-100 | 5       | 0      | 1       | 0       | 2       | 0       | 2       | 0       |

ASCs Activated Schwann cells; NSCs normal Schwann cells; HQ high-quality; G Guanine; C Cytosine.

**Table S2.** Primers of methylated genes validated by qRT-PCR

| Gene   | Forward                         | Reverse                        |
|--------|---------------------------------|--------------------------------|
| Dgcr8  | 5' -GCATGTGTTTCCTTCTGCTCTGAT-3' | 5' -CAGGACGCACTGAGGAGGTAGT-3'  |
| Zeb2   | 5' -TAGCCGGTCCAGAAGAAATG-3'     | 5' -GGCCATCTCTTTCCTCCAGT-3'    |
| Dixdc1 | 5' -ATCCATCAAGCACCATCAAC-3'     | 5' -CCCAAACCTTCCAGTCGT-3'      |
| Sox2   | 5' -TGGACAGTTACGCGCACAT-3'      | 5' -CGAGTAGGACATGCTGTAGGT-3'   |
| Shh    | 5' -CTGCTGGTATGCTCGGGACTG-3'    | 5' -TAAATCGCTCGGAGTTTCTGG-3'   |
| Gpr126 | 5' -CCAAAGTTGGCAATGAAGGT-3'     | 5' -GCTGGATCAGGTAGGAACCA-3'    |
| Birc2  | 5' -CAGCTTTGTGCAGACTTTGCTTTC-3' | 5' -CCTTGTTCCAGAGGTAGCGAGTG-3' |
| GAPDH  | 5' -AGAGCTACGAGCTGCCTGAC-3'     | 5' -AGCACTGTGTTGGCGTACAG-3'    |
